# Supplementary material for: Surgical blood loss during holmium laser enucleation of the prostate (HoLEP) is not affected by short-term pretreatment with dutasteride: a double-blind placebo-controlled trial on prostate vascularity
Source: publisher site journal article supplement (doi:10.18632/aging.102883), 2020-03-11
Supplement: Supplementary file [file aging-v12i5-102883-supplementary-material-SD1.pdf]

## SUPPLEMENTARY FIGURE

### Flow Diagram

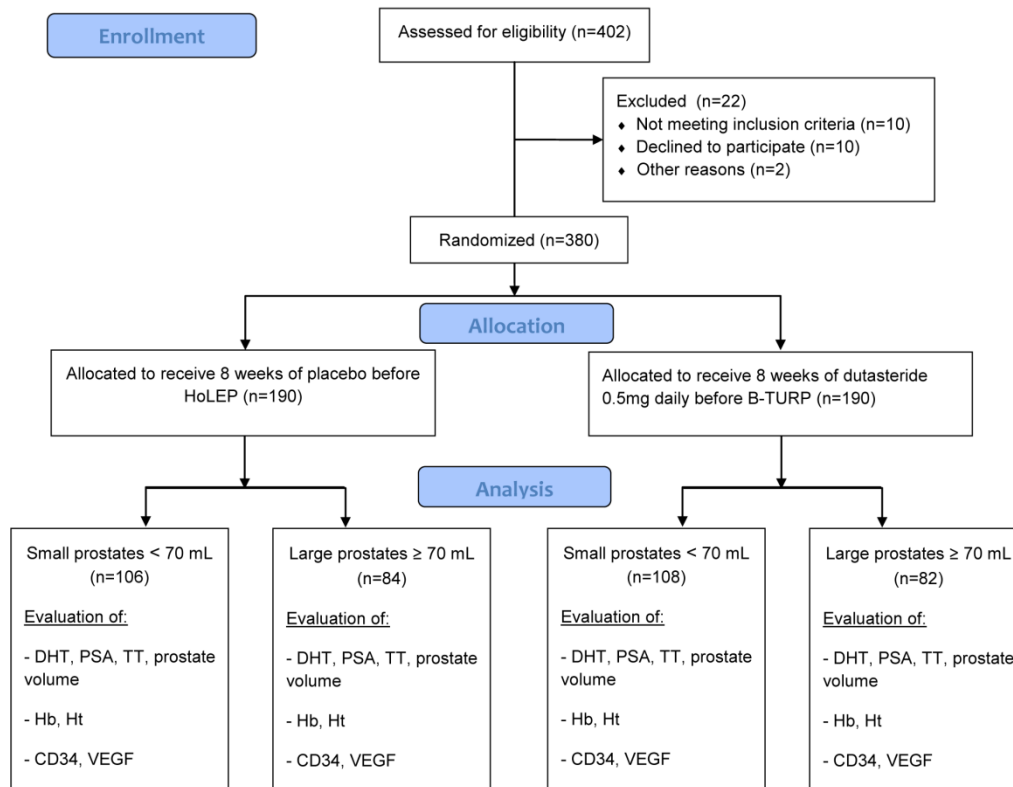

Supplementary Figure 1. Flow diagram of the study.
